# Supplementary material for: Molecular mechanics modelling of porphyrins. Using artificial neural networks to develop metal parameters for four-coordinate metalloporphyrinsElectronic supplementary information (ESI) available: Molecular mechanics parameters, comparisons between crystallographic and molecular mechanics geometries, error response surfaces, and crystal structures. See http://www.rsc.org/suppdata/cp/b2/b203360g/
Source: Royal Society of Chemistry journal article supplement (doi:10.1039/b203360g), 2002-10-21
Supplement: tablesandfigures.doc [file tablesandfigures.doc]

**Molecular Mechanics Modelling of Porphyrins.**

**Using Artificial Neural Networks to Develop Metal**

**Parameters for Four-Coordinate**

**Metalloporphyrins**

# Helder M. Marques* and Ignacy Cukrowski*

Molecular Sciences Institute, School of Chemistry, University of the Witwatersrand, P.O. Wits, Johannesburg, 2050 South Africa.

# E-mail: hmarques@aurum.chem.wits.ac.za; ignacy@aurum.chem.wits.ac.za

# SUPPLEMENTARY MATERIAL

**Table S1** Additional bond stretching parameters for the MM2 force field for modeling of four-coordinate metalloporphyrins.*

| **T1** | **T2** | ***k*s** | ***l*o** | **DIPOLE** |
| --- | --- | --- | --- | --- |
| c4 | c4 | 4.50 | 1.523 | 0.000 |
| c4 | h | 4.60 | 1.113 | 0.000 |
| cm | h | 4.60 | 1.101 | 0.000 |
| ca | na | 11.09 | 1.380 | 1.260 |
| ca | nb | 11.09 | 1.380 | 1.260 |
| ca | cm | 9.60 | 1.389 | 0.000 |
| ca | cb | 4.80 | 1.439 | 0.000 |
| cb | cb | 10.50 | 1.350 | 0.000 |
| cm | cp | 10.50 | 1.499 | 0.000 |
| cb | c4 | 11.80 | 1.509 | 0.000 |
| cb | h | 4.60 | 1.101 | 0.000 |
| cp | cp | 9.60 | 1.337 | 0.000 |
| cp | h | 4.60 | 1.101 | 0.000 |
| zn | na | 1.30 | 2.000 | 0.000 |
| zn | nb | 1.30 | 2.000 | 0.000 |
| cu | na | 1.89 | 1.920 | 0.000 |
| cu | nb | 1.89 | 1.920 | 0.000 |
| ni | na | 3.01 | 1.869 | 0.000 |
| ni | nb | 3.01 | 1.869 | 0.000 |
| co2 | na | 1.70 | 1.860 | 0.000 |
| co2 | nb | 1.70 | 1.860 | 0.000 |
| pd | na | 3.90 | 1.997 | 0.000 |
| pd | nb | 3.90 | 1.997 | 0.000 |
| cb | br | 2.50 | 1.881 | 1.560 |
| cp | f | 5.40 | 1.320 | 1.480 |
| cb | cl | 3.40 | 1.719 | 1.580 |
| cb | cp | 10.50 | 1.499 | 0.000 |
| c4 | cp | 4.40 | 1.497 | 0.300 |
| c4 | cm | 4.40 | 1.497 | 0.300 |
| c4 | n3 | 5.10 | 1.438 | 0.040 |
| cp | n3 | 6.32 | 1.377 | -0.400 |
| c4 | o3 | 5.36 | 1.402 | 0.440 |
| cp | o3 | 6.00 | 1.355 | 0.001 |
| c4 | f | 5.10 | 1.392 | 1.820 |
| cb | c3 | 9.60 | 1.337 | 0.000 |
| c3 | c3 | 9.60 | 1.337 | 0.000 |
| c3 | h | 4.60 | 1.101 | 0.000 |
| c4 | co | 4.40 | 1.509 | 0.300 |
| o3 | h | 4.60 | 0.942 | -1.115 |
| cm | n2 | 6.32 | 1.377 | -0.400 |
| o1 | n2 | 7.55 | 1.220 | -2.530 |

*Force constant, *k*s (mdyn Å-1) for the bond between atoms T1 and T2, where *l*o is the equilibrium (strain-free) bond length (Å), and DIPOLE is the bond dipole moment (D).

**Table S2** Additional angle bending parameters for the MM2 force field for modeling of four-coordinate metalloporphyrins.*

| **T1** | **T2** | **T3** | ***k*b** | **θ0** |
| --- | --- | --- | --- | --- |
| na | zn | na | 0.200 | 180.0 |
| nb | zn | nb | 0.200 | 180.0 |
| na | zn | nb | 0.200 | 90.0 |
| na | cu | na | 0.200 | 180.0 |
| nb | cu | nb | 0.200 | 180.0 |
| na | cu | nb | 0.200 | 90.0 |
| na | ni | na | 0.200 | 180.0 |
| nb | ni | nb | 0.200 | 180.0 |
| na | ni | nb | 0.200 | 90.0 |
| na | co2 | na | 0.200 | 180.0 |
| nb | co2 | nb | 0.200 | 180.0 |
| na | co2 | nb | 0.200 | 90.0 |
| na | pd | na | 0.200 | 180.0 |
| nb | pd | nb | 0.200 | 180.0 |
| na | pd | nb | 0.200 | 90.0 |
| zn | na | ca | 0.700 | 127.0 |
| zn | nb | ca | 0.700 | 127.0 |
| cu | na | ca | 0.700 | 127.0 |
| cu | nb | ca | 0.700 | 127.0 |
| ni | na | ca | 0.700 | 127.0 |
| ni | nb | ca | 0.700 | 127.0 |
| co2 | na | ca | 0.700 | 127.0 |
| co2 | nb | ca | 0.700 | 127.0 |
| pd | na | ca | 0.700 | 127.0 |
| pd | nb | ca | 0.700 | 127.0 |
| na | ca | cb | 0.300 | 110.0 |
| na | ca | cm | 0.240 | 125.0 |
| ca | cb | cb | 0.470 | 107.0 |
| ca | cm | ca | 0.200 | 125.0 |
| ca | cm | cp | 0.200 | 118.0 |
| ca | cb | h | 0.360 | 120.0 |
| cb | cb | h | 0.360 | 120.0 |
| cm | cp | cp | 0.430 | 120.0 |
| cp | cp | cp | 0.430 | 120.0 |
| cm | cp | h | 0.360 | 120.0 |
| cp | cp | h | 0.360 | 120.0 |
| ca | na | ca | 0.600 | 106.0 |
| cm | ca | cb | 0.400 | 125.0 |
| cm | ca | nb | 0.240 | 125.0 |
| nb | ca | cb | 0.300 | 110.0 |
| ca | nb | ca | 0.600 | 106.0 |
| cp | cp | f | 0.650 | 121.0 |
| c4 | c4 | h | 0.360 | 109.4 |
| h | c4 | h | 0.320 | 109.4 |
| h | c4 | cb | 0.360 | 110.0 |
| c4 | cb | ca | 0.400 | 120.0 |
| c4 | cb | cb | 0.400 | 120.0 |
| cb | c4 | c4 | 0.350 | 112.0 |
| h | cm | ca | 0.200 | 118.0 |
| br | cb | cb | 0.400 | 120.0 |
| br | cb | ca | 0.400 | 120.0 |
| cl | cb | cb | 0.550 | 118.8 |
| cl | cb | ca | 0.550 | 118.8 |
| ca | cb | cp | 0.200 | 120.0 |
| cb | cb | cp | 0.200 | 120.0 |
| cb | cp | cp | 0.430 | 120.0 |
| cp | cp | c4 | 0.550 | 121.4 |
| cp | c4 | h | 0.360 | 109.4 |
| ca | cm | c4 | 0.550 | 121.4 |
| cm | c4 | h | 0.360 | 109.4 |
| cm | c4 | c4 | 0.450 | 109.5 |
| c4 | c4 | c4 | 0.450 | 109.5 |
| h | c4 | n3 | 0.500 | 108.8 |
| cp | n3 | c4 | 0.698 | 107.0 |
| n3 | cp | cp | 0.616 | 123.0 |
| c4 | n3 | c4 | 0.630 | 107.7 |
| cp | cp | o3 | 0.700 | 124.3 |
| o3 | c4 | h | 0.540 | 106.7 |
| cp | o3 | c4 | 0.770 | 110.8 |
| cm | c4 | f | 0.650 | 109.0 |
| f | c4 | c4 | 0.650 | 109.5 |
| f | c4 | f | 1.070 | 107.1 |
| cb | cb | c3 | 0.430 | 120.0 |
| c3 | cb | ca | 0.430 | 120.0 |
| cb | c3 | c3 | 0.430 | 120.0 |
| cb | c3 | c3 | 0.430 | 120.0 |
| cb | c3 | h | 0.360 | 120.0 |
| c3 | c3 | h | 0.360 | 120.0 |
| h | c3 | h | 0.320 | 120.0 |
| c4 | c4 | co | 0.450 | 107.8 |
| co | c4 | h | 0.370 | 107.9 |
| c4 | co | o2 | 0.650 | 107.1 |
| o2 | co | o2 | 0.800 | 122.0 |
| h | o3 | h | 0.400 | 104.5 |
| h | o3 | lp | 0.240 | 101.0 |
| cp | o3 | h | 0.350 | 108.0 |
| cp | c4 | c4 | 0.450 | 109.5 |
| cm | n2 | o1 | 0.800 | 115.0 |
| ca | cm | n2 | 0.600 | 113.5 |
| o1 | n2 | o1 | 0.600 | 128.6 |

*Angle bending force constant, *k*b (mdyn Å rad-2) for the angle T1-T2-T3, where θo is the equilibrium (strain-free) bond angle (deg).

**Table S3** Additional torsional parameters for the MM2 force field for modeling of four-coordinate metalloporphyrins.*

| **T1** | **T2** | **T3** | **T4** | **V1** | **V2** | **V3** |
| --- | --- | --- | --- | --- | --- | --- |
| ca | na | cu | na | 0.000 | 3.000 | 0.000 |
| ca | na | cu | nb | 0.000 | 3.000 | 0.000 |
| ca | nb | cu | nb | 0.000 | 3.000 | 0.000 |
| ca | nb | cu | na | 0.000 | 3.000 | 0.000 |
| cu | na | ca | cb | 0.000 | 0.250 | 0.000 |
| cu | nb | ca | cb | 0.000 | 0.250 | 0.000 |
| cu | na | ca | cm | 0.000 | 0.240 | 0.000 |
| cu | nb | ca | cm | 0.000 | 0.240 | 0.000 |
| ca | na | ni | na | 0.000 | 3.000 | 0.000 |
| ca | na | ni | nb | 0.000 | 3.000 | 0.000 |
| ca | nb | ni | nb | 0.000 | 3.000 | 0.000 |
| ca | nb | ni | na | 0.000 | 3.000 | 0.000 |
| ca | na | co2 | na | 0.000 | 3.000 | 0.000 |
| ca | na | co2 | nb | 0.000 | 3.000 | 0.000 |
| ca | nb | co2 | nb | 0.000 | 3.000 | 0.000 |
| ca | nb | co2 | na | 0.000 | 3.000 | 0.000 |
| ca | na | zn | na | 0.000 | 3.000 | 0.000 |
| ca | na | zn | nb | 0.000 | 3.000 | 0.000 |
| ca | nb | zn | nb | 0.000 | 3.000 | 0.000 |
| ca | nb | zn | na | 0.000 | 3.000 | 0.000 |
| ca | na | pd | na | 0.000 | 3.000 | 0.000 |
| ca | na | pd | nb | 0.000 | 3.000 | 0.000 |
| ca | nb | pd | nb | 0.000 | 3.000 | 0.000 |
| ca | nb | pd | na | 0.000 | 3.000 | 0.000 |
| ni | na | ca | cb | 0.000 | 0.250 | 0.000 |
| ni | nb | ca | cb | 0.000 | 0.250 | 0.000 |
| ni | na | ca | cm | 0.000 | 0.240 | 0.000 |
| ni | nb | ca | cm | 0.000 | 0.240 | 0.000 |
| co2 | na | ca | cb | 0.000 | 0.250 | 0.000 |
| co2 | nb | ca | cb | 0.000 | 0.250 | 0.000 |
| co2 | na | ca | cm | 0.000 | 0.240 | 0.000 |
| co2 | nb | ca | cm | 0.000 | 0.240 | 0.000 |
| zn | na | ca | cb | 0.000 | 0.250 | 0.000 |
| zn | nb | ca | cb | 0.000 | 0.250 | 0.000 |
| zn | na | ca | cm | 0.000 | 0.240 | 0.000 |
| zn | nb | ca | cm | 0.000 | 0.240 | 0.000 |
| pd | na | ca | cb | 0.000 | 0.250 | 0.000 |
| pd | nb | ca | cb | 0.000 | 0.250 | 0.000 |
| pd | na | ca | cm | 0.000 | 0.240 | 0.000 |
| pd | nb | ca | cm | 0.000 | 0.240 | 0.000 |
| ca | na | ca | cb | 0.000 | 10.000 | 0.000 |
| ca | nb | ca | cb | 0.000 | 10.000 | 0.000 |
| ca | na | ca | cb | 0.000 | 7.200 | 0.000 |
| ca | nb | ca | cb | 0.000 | 7.200 | 0.000 |
| na | ca | cm | h | 0.000 | 3.800 | 0.000 |
| nb | ca | cm | h | 0.000 | 3.800 | 0.000 |
| cb | ca | cm | h | 0.000 | 1.800 | 0.000 |
| na | ca | cm | ca | 0.000 | 0.800 | 0.000 |
| nb | ca | cm | ca | 0.000 | 0.800 | 0.000 |
| cb | ca | cm | ca | -0.170 | 1.950 | 0.000 |
| nb | ca | cm | cp | 0.000 | 0.800 | 0.000 |
| na | ca | cm | cp | 0.000 | 0.800 | 0.000 |
| na | ca | cb | cb | 0.000 | 9.100 | 0.000 |
| nb | ca | cb | cb | 0.000 | 9.100 | 0.000 |
| na | ca | cb | h | 0.000 | 15.000 | 0.000 |
| nb | ca | cb | h | 0.000 | 15.000 | 0.000 |
| ca | cb | cb | ca | 0.000 | 5.600 | 0.000 |
| ca | cb | cb | h | 0.000 | 9.000 | -1.060 |
| cm | ca | cb | cb | 0.000 | 4.000 | 0.000 |
| cm | ca | cb | h | 0.000 | 9.000 | -1.060 |
| cm | ca | cb | c4 | -0.130 | 5.000 | 0.000 |
| ca | cb | cb | c4 | -0.270 | 9.000 | 0.000 |
| nb | ca | cb | c4 | 0.000 | 15.000 | 0.000 |
| na | ca | cb | c4 | 0.000 | 15.000 | 0.000 |
| c4 | cb | cb | c4 | -1.000 | 10.000 | 0.000 |
| h | cb | cb | h | 0.000 | 15.000 | 0.000 |
| c4 | cb | cb | h | 0.000 | 12.500 | 0.000 |
| h | c4 | cb | cb | 0.000 | 0.000 | -0.240 |
| h | c4 | cb | ca | 0.000 | 0.000 | -0.240 |
| c4 | c4 | cb | ca | -0.440 | -0.700 | 0.200 |
| c4 | c4 | cb | cb | -0.440 | -0.700 | 0.200 |
| h | c4 | c4 | cb | 0.000 | 0.000 | -0.240 |
| cp | cp | cp | cp | -0.930 | 5.330 | 0.000 |
| h | cp | cp | h | 0.000 | 10.000 | 0.000 |
| h | cp | cp | cp | 0.000 | 6.000 | -1.060 |
| cm | cp | cp | cp | -0.270 | 10.000 | 0.000 |
| cm | cp | cp | h | 0.000 | 9.000 | -1.060 |
| cb | ca | cm | cp | 0.000 | 2.000 | 0.000 |
| ca | cm | cp | cp | 0.000 | 0.000 | 0.000 |
| ca | na | ca | cm | 0.000 | 8.500 | 0.000 |
| cm | ca | nb | ca | 0.000 | 8.500 | 0.000 |
| cm | ca | na | ca | 0.000 | 8.500 | 0.000 |
| cm | cp | cp | f | 0.000 | 0.000 | 0.000 |
| cp | cp | cp | f | 0.000 | 15.000 | 0.000 |
| f | cp | cp | f | -2.060 | 15.000 | 0.000 |
| h | c4 | c4 | h | 0.000 | 0.000 | 0.237 |
| h | cm | ca | cb | 0.000 | 1.800 | 0.000 |
| h | cm | ca | na | 0.000 | 3.800 | 0.000 |
| h | cm | ca | nb | 0.000 | 3.800 | 0.000 |
| br | cb | cb | br | -1.000 | 10.000 | 0.000 |
| br | cb | ca | cm | -0.130 | 5.000 | 0.000 |
| br | cb | ca | na | 0.000 | 15.000 | 0.000 |
| br | cb | ca | nb | 0.000 | 15.000 | 0.000 |
| br | cb | cb | ca | -0.270 | 9.000 | 0.000 |
| cl | cb | cb | cl | -1.000 | 10.000 | 0.000 |
| cl | cb | ca | cm | -0.130 | 5.000 | 0.000 |
| cl | cb | ca | na | 0.000 | 15.000 | 0.000 |
| cl | cb | ca | nb | 0.000 | 15.000 | 0.000 |
| cl | cb | cb | ca | -0.270 | 9.000 | 0.000 |
| na | ca | cb | cp | 0.000 | 15.000 | 0.000 |
| nb | ca | cb | cp | 0.000 | 15.000 | 0.000 |
| ca | cb | cb | cp | 0.000 | 9.000 | -1.060 |
| cb | cp | cp | cp | -0.270 | 10.000 | 0.000 |
| cb | cb | cp | cp | 0.000 | 0.000 | 0.000 |
| cm | ca | cb | cp | 0.000 | 9.000 | -1.060 |
| cb | cp | cp | h | 0.000 | 9.000 | -1.060 |
| ca | cb | cp | cp | 0.000 | 0.000 | 0.000 |
| cp | cb | cb | cp | 0.000 | 15.000 | 0.000 |
| cm | cp | cp | c4 | 0.000 | 9.000 | -1.060 |
| cp | cp | c4 | h | 0.000 | 0.000 | -0.240 |
| cp | cp | cp | c4 | -0.270 | 10.000 | 0.000 |
| c4 | cp | cp | h | 0.000 | 12.500 | 0.000 |
| na | ca | cm | c4 | 0.000 | 3.800 | 0.000 |
| nb | ca | cm | c4 | 0.000 | 3.800 | 0.000 |
| ca | cm | c4 | h | 0.000 | 0.000 | -0.240 |
| cb | ca | cm | c4 | 0.000 | 0.000 | -0.240 |
| ca | cm | c4 | c4 | 0.000 | 0.000 | -0.240 |
| cm | c4 | c4 | h | 0.000 | 0.000 | -0.240 |
| c4 | c4 | c4 | h | 0.000 | 0.000 | 0.267 |
| h | c4 | n3 | cp | 0.000 | 0.000 | 0.450 |
| h | c4 | n3 | c4 | 0.000 | 0.000 | 0.520 |
| c4 | n3 | cp | cp | -1.570 | 3.200 | 0.000 |
| n3 | cp | cp | cp | 0.000 | 15.000 | 0.000 |
| n3 | cp | cp | f | 0.000 | 15.000 | 0.000 |
| f | cp | cp | f | -2.060 | 15.500 | 0.000 |
| cp | cp | cp | o3 | 0.000 | 16.250 | 0.000 |
| cp | cp | o3 | c4 | 3.530 | 2.300 | -3.530 |
| cp | o3 | c4 | h | 0.000 | 0.000 | 0.530 |
| o3 | cp | cp | h | 0.000 | 16.250 | 0.000 |
| ca | cm | c4 | f | 0.000 | 15.000 | 0.000 |
| cm | c4 | c4 | f | 0.000 | 0.000 | 0.500 |
| cm | c4 | c4 | c4 | 0.170 | 0.270 | 0.093 |
| c4 | c4 | c4 | f | 0.000 | -0.086 | 0.930 |
| f | c4 | c4 | f | -0.100 | -2.000 | 0.200 |
| na | ca | cb | c3 | 0.000 | 15.000 | 0.000 |
| cb | c4 | c4 | co | 2.100 | 0.270 | 0.093 |
| ca | cb | cb | c3 | -0.270 | 9.000 | 0.000 |
| cb | cb | c3 | c3 | -0.930 | 8.000 | 0.000 |
| cb | cb | c3 | h | 0.000 | 9.000 | -1.060 |
| c4 | cb | cb | c3 | -0.270 | 10.000 | 0.000 |
| cb | c3 | c3 | h | 0.000 | 9.000 | -1.060 |
| c3 | cb | ca | cm | -0.930 | 8.000 | 0.000 |
| c3 | c3 | cb | ca | -0.930 | 8.000 | 0.000 |
| nb | ca | cb | c3 | 0.000 | 15.000 | 0.000 |
| ca | cb | c3 | h | 0.000 | 9.000 | -1.060 |
| h | c3 | c3 | h | 0.000 | 15.000 | 0.000 |
| c4 | c4 | co | o2 | 0.400 | -0.300 | -0.070 |
| co | c4 | c4 | h | 0.000 | 0.000 | 0.180 |
| o2 | co | c4 | h | 0.000 | 0.000 | -0.016 |
| o3 | cp | cp | c4 | -1.200 | 16.250 | 0.000 |
| cp | cp | c4 | c4 | -0.440 | 0.240 | 0.060 |
| cp | cp | c4 | h | 0.000 | 0.000 | -0.240 |
| cp | cp | o3 | h | 2.000 | 1.700 | -2.000 |
| cp | c4 | c4 | h | 0.000 | 0.000 | 0.500 |
| c4 | c4 | c4 | c4 | 0.200 | 0.270 | 0.093 |
| cp | c4 | c4 | c4 | 0.170 | 0.270 | 0.093 |
| nb | ca | cm | n2 | 0.000 | 0.800 | 0.000 |
| na | ca | cm | n2 | 0.000 | 0.800 | 9.000 |
| ca | cm | n2 | o1 | 0.000 | 0.000 | 0.000 |
| cb | ca | cm | n2 | 0.000 | 2.000 | 0.000 |

*Parameters (kcal mol-1) for the torsional angle T1-T2-T3-T4; the parameters V1, V2 and V3 are the first three terms of the Taylor expansion used to model torsions in the MM2 force field.

**Table S4** Additional van der Waals parameters for the MM2 force field for modeling of four-coordinate metalloporphyrins.*

| **Atom Type** | ***r**** | **εr** |
| --- | --- | --- |
| c4 | 1.94 | 0.044 |
| c3 | 1.94 | 0.044 |
| c2 | 1.94 | 0.044 |
| ca | 1.94 | 0.044 |
| cb | 1.94 | 0.044 |
| cm | 1.94 | 0.044 |
| cp | 1.94 | 0.044 |
| h | 1.5 | 0.047 |
| f | 1.65 | 0.078 |
| na | 1.82 | 0.055 |
| nb | 1.82 | 0.055 |
| n2 | 1.82 | 0.055 |
| zn | 2.11 | 0.044 |
| cu | 1.97 | 0.044 |
| pd | 2.11 | 0.044 |
| ni | 1.96 | 0.044 |
| br | 2.18 | 0.320 |
| cl | 2.03 | 0.240 |
| co2 | 2.2 | 0.020 |
| n3 | 1.82 | 0.055 |
| o3 | 1.74 | 0.050 |
| o1 | 1.74 | 0.050 |
| co | 1.94 | 0.044 |
| o2 | 1.74 | 0.050 |
| ho | 0.95 | 0.036 |

*In kcal mol-1

**Table S5** Additional out-of-plane parameters for the MM2 force field for modeling of four-coordinate metalloporphyrins.*

| **C** | **A** | **COPB** |
| --- | --- | --- |
| na | zn | 0.600 |
| nb | zn | 0.600 |
| na | cu | 0.600 |
| nb | cu | 0.600 |
| na | ni | 0.600 |
| nb | ni | 0.600 |
| na | co2 | 0.600 |
| nb | co2 | 0.600 |
| na | pd | 0.600 |
| nb | pd | 0.600 |
| ca | nb | 0.005 |
| ca | na | 0.005 |
| nb | ca | 0.005 |
| cp | cp | 0.050 |
| cm | cp | 0.050 |
| na | ca | 0.005 |
| ca | cb | 0.040 |
| ca | cm | 0.010 |
| cb | ca | 0.040 |
| cb | cb | 0.050 |
| cb | c3 | 0.050 |
| cm | ca | 0.010 |
| cp | cm | 0.050 |
| cb | h | 0.050 |
| cm | h | 0.050 |
| cp | h | 0.050 |
| cp | f | 0.050 |
| cb | c4 | 0.050 |
| cm | h | 0.050 |
| cb | br | 0.050 |
| cb | cl | 0.050 |
| cb | cp | 0.050 |
| cp | cb | 0.050 |
| cp | c4 | 0.050 |
| cm | c4 | 0.050 |
| cp | n3 | 0.050 |
| cp | o3 | 0.050 |
| co | o2 | 0.200 |
| co | c4 | 0.200 |
| cm | n2 | 0.050 |

*Values (mdyn Å rad-2) refer to the situation in which atom C is out of plane relative to atom A.

# Table S6 Comparison of the deviations (in pm) of the 25 atoms of the porphyrin core from the mean plane through them as observed crystallographically and as predicted by MM

| **Atom** | **Deviation from mean porphyrin plane /pm** | | | | | | | |
| --- | --- | --- | --- | --- | --- | --- | --- | --- |
|  | **[Co(OEP)]** | | | |  | **[Co(5,10,15,20-tetrakis(heptafluoropropyl)-porphyrin)]** | | |
|  | MM Calc | Exp Obs | Obs-Calc | |  | MM Calc | Exp Obs | Obs-Calc |
| Co | 0 | 0 | 0 | |  | 0 | 0 | 1 |
| N21 | 4 | 1 | -3 | |  | -7 | -26 | -19 |
| N22 | 5 | 2 | -3 | |  | 33 | 49 | 16 |
| N23 | -4 | -1 | 3 | |  | 1 | -10 | -11 |
| N24 | -6 | -2 | 4 | |  | -42 | -12 | 30 |
| C1 | -3 | -4 | -1 | |  | -54 | -53 | 1 |
| C2 | -7 | -5 | 2 | |  | -152 | -108 | 44 |
| C3 | 1 | 2 | 1 | |  | -152 | -105 | 47 |
| C4 | 8 | 6 | -2 | |  | -52 | -45 | 6 |
| C5 | 11 | 6 | -4 | |  | -6 | 4 | 10 |
| C6 | 3 | 1 | -2 | |  | 69 | 65 | -3 |
| C7 | -11 | -6 | 5 | |  | 192 | 142 | -51 |
| C8 | -10 | -5 | 5 | |  | 225 | 166 | -58 |
| C9 | 2 | 1 | -2 | |  | 125 | 103 | -22 |
| C10 | 9 | 3 | -5 | |  | 117 | 79 | -38 |
| C11 | 3 | 4 | 1 | |  | 23 | 8 | -14 |
| C12 | 6 | 5 | -1 | |  | -73 | -47 | 27 |
| C13 | -2 | -2 | -1 | |  | -131 | -91 | 40 |
| C14 | -8 | -6 | 2 | |  | -74 | -63 | 11 |
| C15 | -11 | -6 | 4 | |  | -97 | -63 | 33 |
| C16 | -3 | -1 | 2 | |  | -38 | -19 | 18 |
| C17 | 11 | 6 | -5 | |  | 34 | 11 | -24 |
| C18 | 10 | 5 | -5 | |  | 58 | 29 | -29 |
| C19 | -2 | -1 | 1 | |  | 1 | 6 | 6 |
| C20 | -9 | -3 | 5 | |  | -14 | -21 | -7 |
|  | **|Mean|:** | | | **3** |  | **|Mean|:** | | **23** |
|  | **[Co(5,10,15,20-tetrakis(4-dimethylamino-2,3,5,6-tetrafluorophenyl)porphyrin]** | | | |  | **[Co(TPF5P)]** | | |
|  | MM Calc | Exp Obs | Obs-Calc | |  | MM Calc | Exp Obs | Obs-Calc |
| Co | 0 | 0 | 0 | |  | 0 | 0 | 0 |
| N21 | 0 | -1 | 0 | |  | 1 | 2 | 1 |
| N22 | -2 | 1 | 3 | |  | -1 | 0 | 1 |
| N23 | 0 | 1 | 1 | |  | 0 | -2 | -1 |
| N24 | 2 | -1 | -3 | |  | 1 | 0 | -1 |
| C1 | 1 | 3 | 2 | |  | 2 | 2 | 0 |
| C2 | 1 | -1 | -2 | |  | -1 | -1 | 0 |
| C3 | -1 | -2 | -1 | |  | -3 | -3 | 0 |
| C4 | -1 | -1 | 1 | |  | -1 | -1 | -1 |
| C5 | -2 | 2 | 3 | |  | 0 | 0 | 0 |
| C6 | -1 | 0 | 1 | |  | 2 | 1 | 0 |
| C7 | 3 | 0 | -3 | |  | 5 | 6 | 1 |
| C8 | 2 | 1 | -1 | |  | 2 | 1 | 0 |
| C9 | -1 | -2 | 0 | |  | -2 | -2 | 0 |
| C10 | -3 | -1 | 1 | |  | -5 | -5 | 0 |
| C11 | -1 | -3 | -2 | |  | -2 | -2 | 0 |
| C12 | -1 | 1 | 2 | |  | 1 | 1 | 0 |
| C13 | 1 | 2 | 1 | |  | 3 | 3 | 0 |
| C14 | 1 | 1 | -1 | |  | 1 | 1 | 1 |
| C15 | 2 | -2 | -3 | |  | 0 | 0 | 0 |
| C16 | 1 | 0 | -1 | |  | -2 | -1 | 1 |
| C17 | -3 | 0 | 3 | |  | -5 | -6 | 0 |
| C18 | -2 | -1 | 1 | |  | -2 | -1 | 0 |
| C19 | 1 | 2 | 0 | |  | 2 | 2 | 1 |
| C20 | 3 | 1 | -1 | |  | 5 | 5 | 0 |
|  | |Mean|: | | | 1 |  | **|Mean|:** | | **0** |
|  | Co(TPP)] | | | |  | **[Co(TPOMeP)]** | | |
|  | MM Calc | Exp Obs | Obs-Calc | |  | MM Calc | Exp Obs | Obs-Calc |
| Co | 0 | 0 | 0 | |  | 0 | 1 | 1 |
| N21 | 0 | 2 | 2 | |  | 111 | 111 | 0 |
| N22 | 0 | -2 | -2 | |  | -112 | -157 | -45 |
| N23 | 0 | 2 | 2 | |  | -73 | -107 | -34 |
| N24 | 0 | -2 | -2 | |  | 159 | 151 | -8 |
| C1 | 14 | 23 | 9 | |  | 249 | 236 | -13 |
| C2 | 4 | 9 | 6 | |  | 293 | 280 | -13 |
| C3 | -19 | -24 | -5 | |  | 183 | 171 | -12 |
| C4 | -19 | -25 | -7 | |  | 70 | 71 | 2 |
| C5 | -37 | -42 | -6 | |  | -61 | -48 | 13 |
| C6 | -14 | -23 | -9 | |  | -167 | -161 | 6 |
| C7 | -4 | -9 | -6 | |  | -305 | -286 | 19 |
| C8 | 19 | 24 | 5 | |  | -380 | -366 | 15 |
| C9 | 19 | 25 | 7 | |  | -290 | -282 | 8 |
| C10 | 37 | 42 | 6 | |  | -331 | -334 | -3 |
| C11 | 14 | 23 | 9 | |  | -247 | -245 | 1 |
| C12 | 4 | 9 | 6 | |  | -289 | -278 | 11 |
| C13 | -19 | -24 | -5 | |  | -182 | -180 | 2 |
| C14 | -19 | -25 | -7 | |  | -71 | -64 | 7 |
| C15 | -37 | -42 | -6 | |  | 57 | 67 | 10 |
| C16 | -14 | -23 | -9 | |  | 165 | 167 | 2 |
| C17 | -4 | -9 | -6 | |  | 301 | 301 | 0 |
| C18 | 19 | 24 | 5 | |  | 379 | 365 | -14 |
| C19 | 19 | 25 | 7 | |  | 292 | 277 | -15 |
| C20 | 37 | 42 | 6 | |  | 336 | 311 | -25 |
|  | **|Mean|:** | | **6** | |  | **|Mean|:** | | **11** |
|  | [Cu(OEP)] | | | |  | **[Cu(TPP)]** | | |
|  | **MM Calc** | **Exp Obs** | **Obs-Calc** | |  | **MM Calc** | **Exp Obs** | **Obs-Calc** |
| Cu | 0 | 0 | 0 | |  | 0 | 0 | 0 |
| N21 | -3 | -1 | 2 | |  | 0 | -1 | 0 |
| N22 | -3 | -3 | 0 | |  | -1 | -2 | -1 |
| N23 | 3 | 1 | -2 | |  | 0 | 1 | 0 |
| N24 | 4 | 3 | -1 | |  | 2 | 2 | 1 |
| C1 | 2 | 1 | 0 | |  | 14 | 17 | 3 |
| C2 | 3 | 3 | 0 | |  | 9 | 10 | 1 |
| C3 | -1 | -1 | 0 | |  | -10 | -12 | -2 |
| C4 | -5 | -3 | 2 | |  | -15 | -19 | -4 |
| C5 | -5 | -4 | 1 | |  | -34 | -38 | -4 |
| C6 | -1 | 0 | 1 | |  | -16 | -20 | -4 |
| C7 | 7 | 4 | -3 | |  | -13 | -16 | -3 |
| C8 | 5 | 2 | -4 | |  | 6 | 6 | 0 |
| C9 | -2 | 1 | 3 | |  | 11 | 14 | 2 |
| C10 | -6 | -1 | 5 | |  | 30 | 33 | 3 |
| C11 | -2 | -1 | 0 | |  | 14 | 17 | 3 |
| C12 | -3 | -3 | 0 | |  | 10 | 12 | 2 |
| C13 | 2 | 1 | -1 | |  | -7 | -8 | -1 |
| C14 | 5 | 3 | -2 | |  | -12 | -15 | -3 |
| C15 | 5 | 4 | -1 | |  | -29 | -32 | -3 |
| C16 | 1 | 0 | -1 | |  | -11 | -13 | -2 |
| C17 | -7 | -4 | 3 | |  | -6 | -6 | 0 |
| C18 | -5 | -2 | 3 | |  | 12 | 15 | 3 |
| C19 | 2 | -1 | -3 | |  | 16 | 19 | 4 |
| C20 | 6 | 1 | -5 | |  | 33 | 37 | 4 |
|  | **|Mean|:** | | **2** | |  | **|Mean|:** | | **2** |
|  | **[Cu(DETPP)] – I** | | | |  | **[Cu(DETPP)] -II** | | |
|  | **MM Calc** | **Exp Obs** | **Obs-Calc** | |  | **MM Calc** | **Exp Obs** | **Obs-Calc** |
| Cu | -6 | 0 | 6 | |  | -10 | -3 | 7 |
| N21 | -15 | -2 | 13 | |  | 6 | 1 | -5 |
| N22 | 1 | 0 | -1 | |  | -14 | -6 | 7 |
| N23 | -3 | 3 | 6 | |  | 1 | -7 | -7 |
| N24 | 5 | 0 | -4 | |  | -13 | 0 | 14 |
| C1 | -24 | -13 | 11 | |  | 21 | 13 | -8 |
| C2 | -48 | -43 | 6 | |  | 58 | 51 | -7 |
| C3 | -51 | -46 | 5 | |  | 64 | 57 | -7 |
| C4 | -27 | -17 | 10 | |  | 30 | 22 | -8 |
| C5 | -5 | -5 | 0 | |  | 13 | 13 | 0 |
| C6 | 15 | 9 | -5 | |  | -19 | -13 | 6 |
| C7 | 52 | 38 | -14 | |  | -54 | -51 | 3 |
| C8 | 54 | 41 | -13 | |  | -71 | -64 | 7 |
| C9 | 22 | 16 | -6 | |  | -43 | -32 | 12 |
| C10 | 7 | 9 | 2 | |  | -28 | -27 | 1 |
| C11 | -15 | -8 | 7 | |  | 9 | 5 | -4 |
| C12 | -46 | -42 | 5 | |  | 57 | 55 | -2 |
| C13 | -55 | -49 | 6 | |  | 75 | 69 | -6 |
| C14 | -23 | -15 | 8 | |  | 37 | 24 | -13 |
| C15 | -1 | -1 | 0 | |  | 18 | 13 | -5 |
| C16 | 22 | 13 | -9 | |  | -15 | -9 | 6 |
| C17 | 58 | 43 | -15 | |  | -42 | -42 | 0 |
| C18 | 61 | 46 | -15 | |  | -49 | -47 | 2 |
| C19 | 23 | 15 | -8 | |  | -26 | -17 | 9 |
| C20 | 5 | 5 | 1 | |  | -4 | -5 | -2 |
|  | **|Mean|** | | **7** | |  | **|Mean|** | | **6** |
|  | **[Cu(HETPP)]** | | | |  | **[Cu(OClTPF5P)]** | | |
|  | **MM Calc** | **Exp Obs** | **Obs-Calc** | |  | **MM Calc** | **Exp Obs** | **Obs-Calc** |
| Cu | 7 | 5 | -2 | |  | 1 | -1 | -2 |
| N21 | -5 | 5 | 11 | |  | -13 | -1 | 12 |
| N22 | 13 | 2 | -10 | |  | 6 | -1 | -7 |
| N23 | -11 | 4 | 14 | |  | -4 | -1 | 2 |
| N24 | 17 | 7 | -11 | |  | 10 | -1 | -12 |
| C1 | -27 | -20 | 7 | |  | -30 | -21 | 9 |
| C2 | -94 | -96 | -2 | |  | -73 | -68 | 5 |
| C3 | -106 | -106 | -1 | |  | -71 | -66 | 4 |
| C4 | -44 | -36 | 9 | |  | -29 | -21 | 8 |
| C5 | -13 | -13 | 0 | |  | -1 | -1 | 0 |
| C6 | 36 | 29 | -7 | |  | 24 | 18 | -7 |
| C7 | 101 | 104 | 3 | |  | 65 | 61 | -4 |
| C8 | 112 | 112 | 0 | |  | 69 | 63 | -6 |
| C9 | 52 | 41 | -11 | |  | 31 | 21 | -10 |
| C10 | 13 | 13 | 0 | |  | 7 | 6 | -1 |
| C11 | -31 | -24 | 7 | |  | -28 | -18 | 9 |
| C12 | -94 | -96 | -2 | |  | -65 | -62 | 3 |
| C13 | -105 | -105 | 0 | |  | -69 | -66 | 4 |
| C14 | -44 | -34 | 11 | |  | -33 | -23 | 10 |
| C15 | -11 | -7 | 4 | |  | -3 | -4 | -1 |
| C16 | 27 | 21 | -6 | |  | 27 | 19 | -8 |
| C17 | 70 | 68 | -3 | |  | 73 | 69 | -4 |
| C18 | 81 | 76 | -5 | |  | 80 | 73 | -7 |
| C19 | 41 | 33 | -8 | |  | 33 | 23 | -10 |
| C20 | 13 | 18 | 5 | |  | 2 | 2 | 0 |
|  | **|Mean|** | | **6** | |  | **|Mean|** | | **6** |
|  | **[Cu(OBrTPF5P)]** | | | |  | **[Cu(OETPP)]** | | |
|  | **MM Calc** | **Exp Obs** | **Obs-Calc** | |  | **MM Calc** | **Exp Obs** | **Obs-Calc** |
| Cu | -1 | 0 | 1 | |  | 0 | -1 | 0 |
| N21 | 7 | -5 | -12 | |  | 115 | 144 | 28 |
| N22 | -6 | 7 | 13 | |  | 48 | 53 | 6 |
| N23 | 22 | 6 | -15 | |  | -50 | -144 | -94 |
| N24 | -22 | -6 | 16 | |  | -45 | -55 | -10 |
| C1 | 40 | 30 | -10 | |  | 138 | 143 | 5 |
| C2 | 101 | 100 | -1 | |  | 195 | 187 | -7 |
| C3 | 95 | 95 | 1 | |  | 234 | 228 | -6 |
| C4 | 32 | 23 | -9 | |  | 200 | 208 | 7 |
| C5 | -15 | -15 | 1 | |  | 237 | 242 | 5 |
| C6 | -52 | -39 | 12 | |  | 182 | 179 | -3 |
| C7 | -113 | -113 | 0 | |  | 230 | 229 | -1 |
| C8 | -96 | -95 | 1 | |  | 129 | 128 | -2 |
| C9 | -25 | -16 | 9 | |  | 21 | 16 | -5 |
| C10 | 34 | 33 | -2 | |  | -111 | -113 | -3 |
| C11 | 69 | 53 | -16 | |  | -198 | -195 | 3 |
| C12 | 135 | 126 | -9 | |  | -341 | -339 | 2 |
| C13 | 113 | 112 | -1 | |  | -376 | -373 | 3 |
| C14 | 40 | 31 | -9 | |  | -254 | -250 | 4 |
| C15 | -15 | -15 | 0 | |  | -234 | -233 | 1 |
| C16 | -58 | -45 | 13 | |  | -122 | -127 | -4 |
| C17 | -122 | -119 | 3 | |  | -79 | -73 | 6 |
| C18 | -114 | -113 | 1 | |  | 15 | 19 | 4 |
| C19 | -47 | -37 | 10 | |  | 32 | 26 | -6 |
| C20 | 0 | 1 | 1 | |  | 103 | 102 | -2 |
|  | **|Mean|** | | **7** | |  | **|Mean|** | | **9** |
|  | **[Ni(TMP)]** | | | |  | **[Ni(OEP)] (flat)** | | |
|  | **MM Calc** | **Exp Obs** | **Obs-Calc** | |  | **MM Calc** | **Exp Obs** | **Obs-Calc** |
| Ni | 0 | 0 | 0 | |  | 0 | 0 | 0 |
| N21 | 5 | 1 | -4 | |  | 0 | 0 | 0 |
| N22 | 0 | 0 | 0 | |  | 1 | -2 | -3 |
| N23 | -1 | -1 | -1 | |  | 0 | 0 | 0 |
| N24 | 1 | 0 | 0 | |  | -1 | 2 | 3 |
| C1 | 4 | 2 | -2 | |  | 0 | 1 | 0 |
| C2 | -11 | -7 | 4 | |  | -6 | -2 | 4 |
| C3 | -11 | -8 | 3 | |  | -7 | -2 | 5 |
| C4 | 3 | -1 | -4 | |  | -2 | 0 | 2 |
| C5 | 9 | 7 | -2 | |  | 5 | 2 | -3 |
| C6 | 5 | 7 | 2 | |  | 5 | 2 | -4 |
| C7 | 3 | 7 | 4 | |  | 6 | 3 | -3 |
| C8 | 0 | -4 | -3 | |  | -4 | 0 | 3 |
| C9 | -5 | -7 | -2 | |  | -4 | -3 | 2 |
| C10 | -12 | -10 | 2 | |  | -10 | -2 | 8 |
| C11 | -4 | -1 | 2 | |  | 0 | -1 | 0 |
| C12 | 11 | 7 | -4 | |  | 6 | 2 | -4 |
| C13 | 11 | 8 | -3 | |  | 7 | 2 | -5 |
| C14 | -3 | 1 | 4 | |  | 2 | 0 | -2 |
| C15 | -9 | -7 | 2 | |  | -5 | -2 | 3 |
| C16 | -5 | -7 | -2 | |  | -6 | -2 | 4 |
| C17 | -3 | -7 | -4 | |  | -6 | -3 | 3 |
| C18 | 0 | 4 | 3 | |  | 3 | 0 | -3 |
| C19 | 5 | 7 | 2 | |  | 4 | 3 | -1 |
| C20 | 12 | 10 | -2 | |  | 10 | 2 | -8 |
|  | **|Mean|** | | **2** | |  | **|Mean|** | | **3** |
|  | **[Ni(5,15-Ph2)ETIOII]** | | | |  | **[Ni(5,15-Et2)ETIOII]** | | |
|  | **MM Calc** | **Exp Obs** | **Obs-Calc** | |  | **MM Calc** | **Exp Obs** | **Obs-Calc** |
| Ni | 14 | 14 | 0 | |  | 14 | 14 | 0 |
| N21 | 10 | 11 | 1 | |  | 10 | 11 | 1 |
| N22 | 11 | 14 | 3 | |  | 11 | 14 | 3 |
| N23 | 6 | 17 | 11 | |  | 6 | 17 | 11 |
| N24 | 14 | 14 | 0 | |  | 14 | 14 | 0 |
| C1 | -25 | -24 | 1 | |  | -25 | -24 | 1 |
| C2 | -44 | -43 | 1 | |  | -44 | -43 | 1 |
| C3 | -14 | -14 | 1 | |  | -14 | -14 | 1 |
| C4 | 24 | 24 | -1 | |  | 24 | 24 | -1 |
| C5 | 69 | 67 | -2 | |  | 69 | 67 | -2 |
| C6 | 30 | 29 | -1 | |  | 30 | 29 | -1 |
| C7 | -4 | -3 | 1 | |  | -4 | -3 | 1 |
| C8 | -34 | -33 | 1 | |  | -34 | -33 | 1 |
| C9 | -19 | -18 | 0 | |  | -19 | -18 | 0 |
| C10 | -40 | -39 | 1 | |  | -40 | -39 | 1 |
| C11 | -17 | -17 | 0 | |  | -17 | -17 | 0 |
| C12 | -33 | -33 | 0 | |  | -33 | -33 | 0 |
| C13 | -1 | -1 | 0 | |  | -1 | -1 | 0 |
| C14 | 34 | 33 | -1 | |  | 34 | 33 | -1 |
| C15 | 76 | 74 | -2 | |  | 76 | 74 | -2 |
| C16 | 32 | 31 | -1 | |  | 32 | 31 | -1 |
| C17 | -3 | -3 | 0 | |  | -3 | -3 | 0 |
| C18 | -35 | -34 | 1 | |  | -35 | -34 | 1 |
| C19 | -21 | -21 | 1 | |  | -21 | -21 | 1 |
| C20 | -46 | -44 | 2 | |  | -46 | -44 | 2 |
|  |  | **|Mean|** | **1** | |  |  | **|Mean|** | **1** |
| **[NiOEP] *(ruf*)** | | | | |  | **[Ni(TiPrP)]** | | |
|  | **MM Calc** | **Exp Obs** | **Obs-Calc** | |  | **MM Calc** | **Exp Obs** | **Obs-Calc** |
| Ni | 0 | 0 | 0 | |  | 0 | -1 | -1 |
| N21 | 0 | 1 | 1 | |  | -3 | -9 | -6 |
| N22 | 0 | -1 | -1 | |  | 7 | 16 | 8 |
| N23 | 0 | 1 | 1 | |  | 2 | 1 | -2 |
| N24 | 0 | -1 | -1 | |  | -8 | -11 | -2 |
| C1 | 28 | 32 | 3 | |  | -43 | -62 | -19 |
| C2 | 23 | 24 | 1 | |  | -37 | -53 | -16 |
| C3 | -17 | -17 | 0 | |  | 5 | 10 | 5 |
| C4 | -27 | -29 | -2 | |  | 26 | 36 | 10 |
| C5 | -60 | -51 | 8 | |  | 71 | 83 | 12 |
| C6 | -28 | -32 | -3 | |  | 42 | 60 | 19 |
| C7 | -23 | -24 | -1 | |  | 42 | 62 | 19 |
| C8 | 17 | 17 | 0 | |  | 12 | 13 | 0 |
| C9 | 27 | 29 | 2 | |  | -12 | -13 | -1 |
| C10 | 60 | 51 | -8 | |  | -50 | -48 | 2 |
| C11 | 28 | 32 | 3 | |  | -24 | -33 | -9 |
| C12 | 23 | 24 | 1 | |  | -23 | -28 | -5 |
| C13 | -17 | -17 | 0 | |  | 5 | 15 | 10 |
| C14 | -27 | -29 | -2 | |  | 27 | 32 | 5 |
| C15 | -60 | -51 | 8 | |  | 62 | 64 | 2 |
| C16 | -28 | -32 | -3 | |  | 25 | 36 | 11 |
| C17 | -23 | -24 | -1 | |  | 16 | 25 | 9 |
| C18 | 17 | 17 | 0 | |  | -21 | -39 | -17 |
| C19 | 27 | 29 | 2 | |  | -40 | -57 | -16 |
| C20 | 60 | 51 | -8 | |  | -83 | -98 | -16 |
|  |  | **|Mean|** | **2** | |  |  | **|Mean|** | **9** |
| **[NiTPP]** | | | | |  | **[NiOBrTPF5P]** | | |
|  | **MM Calc** | **Exp Obs** | **Obs-Calc** | |  | **MM Calc** | **Exp Obs** | **Obs-Calc** |
| Ni | 0 | -1 | -1 | |  | 0 | 0 | 0 |
| N21 | -3 | -9 | -6 | |  | 0 | 1 | 1 |
| N22 | 7 | 16 | 8 | |  | 0 | -1 | -1 |
| N23 | 2 | 1 | -2 | |  | 0 | 1 | 1 |
| N24 | -8 | -11 | -2 | |  | 0 | -1 | -1 |
| C1 | -43 | -62 | -19 | |  | 17 | 23 | 6 |
| C2 | -37 | -53 | -16 | |  | 4 | 9 | 5 |
| C3 | 5 | 10 | 5 | |  | -23 | -27 | -4 |
| C4 | 26 | 36 | 10 | |  | -23 | -28 | -5 |
| C5 | 71 | 83 | 12 | |  | -45 | -45 | 0 |
| C6 | 42 | 60 | 19 | |  | -17 | -23 | -6 |
| C7 | 42 | 62 | 19 | |  | -4 | -9 | -5 |
| C8 | 12 | 13 | 0 | |  | 23 | 27 | 4 |
| C9 | -12 | -13 | -1 | |  | 23 | 28 | 5 |
| C10 | -50 | -48 | 2 | |  | 45 | 45 | 0 |
| C11 | -24 | -33 | -9 | |  | 17 | 23 | 6 |
| C12 | -23 | -28 | -5 | |  | 4 | 9 | 5 |
| C13 | 5 | 15 | 10 | |  | -23 | -27 | -4 |
| C14 | 27 | 32 | 5 | |  | -23 | -28 | -5 |
| C15 | 62 | 64 | 2 | |  | -45 | -45 | 0 |
| C16 | 25 | 36 | 11 | |  | -17 | -23 | -6 |
| C17 | 16 | 25 | 9 | |  | -4 | -9 | -5 |
| C18 | -21 | -39 | -17 | |  | 23 | 27 | 4 |
| C19 | -40 | -57 | -16 | |  | 23 | 28 | 5 |
| C20 | -83 | -98 | -16 | |  | 45 | 45 | 0 |
|  |  | **|Mean|** | **9** | |  |  | **|Mean|** | **3** |
|  | **[NiOBrTMesP]** | | | |  | **Pd(5,10,15,20-tetrakis-(3,5-bis(t-butyl)-4-hydroxyphenyl) porphyrin]** | | |
|  | **MM Calc** | **Exp Obs** | **Obs-Calc** | |  | **MM Calc** | **Exp Obs** | **Obs-Calc** |
| Ni | 0 | 0 | 0 | | Pd | 0 | 0 | 0 |
| N21 | 0 | -19 | -19 | | N21 | 0 | 0 | 0 |
| N22 | 0 | 19 | 19 | | N22 | 0 | 0 | 0 |
| N23 | 0 | -19 | -20 | | N23 | 0 | 0 | 0 |
| N24 | 0 | 19 | 19 | | N24 | 0 | 0 | 0 |
| C1 | -12 | -22 | -10 | | C1 | 1 | 0 | -1 |
| C2 | -84 | -80 | 4 | | C2 | 0 | 1 | 1 |
| C3 | -116 | -120 | -4 | | C3 | 0 | -1 | -1 |
| C4 | -53 | -67 | -15 | | C4 | -1 | 0 | 1 |
| C5 | -41 | -37 | 5 | | C5 | -3 | 0 | 3 |
| C6 | 12 | 22 | 10 | | C6 | -2 | 0 | 2 |
| C7 | 84 | 80 | -4 | | C7 | -2 | -1 | 1 |
| C8 | 115 | 120 | 5 | | C8 | 3 | 2 | -1 |
| C9 | 53 | 67 | 15 | | C9 | 2 | -1 | -3 |
| C10 | 42 | 37 | -5 | | C10 | 3 | 0 | -3 |
| C11 | -11 | -22 | -10 | | C11 | 1 | 1 | 0 |
| C12 | -84 | -80 | 4 | | C12 | 0 | 1 | 1 |
| C13 | -116 | -120 | -4 | | C13 | 0 | -1 | -1 |
| C14 | -53 | -67 | -15 | | C14 | -1 | -1 | 0 |
| C15 | -42 | -37 | 5 | | C15 | -3 | 0 | 3 |
| C16 | 12 | 22 | 10 | | C16 | -2 | 1 | 3 |
| C17 | 84 | 80 | -4 | | C17 | -3 | -2 | 1 |
| C18 | 116 | 120 | 4 | | C18 | 2 | 1 | -1 |
| C19 | 53 | 67 | 14 | | C19 | 2 | 0 | -2 |
| C20 | 42 | 37 | -5 | | C20 | 3 | 0 | -3 |
|  |  | **|Mean|** | **9** | |  |  | **|Mean|** | **1** |
|  | Pd(OEP)] | | | |  | **[Pd(TPP)]** | | |
|  | **MM Calc** | **Exp Obs** | **Obs-Calc** | |  | **MM Calc** | **Exp Obs** | **Obs-Calc** |
| Pd | 0 | 0 | 0 | |  | 0 | 0 | 0 |
| N21 | 0 | 0 | 0 | |  | 0 | -3 | -3 |
| N22 | 0 | -1 | -2 | |  | 0 | 3 | 3 |
| N23 | 0 | 0 | 0 | |  | 0 | -3 | -3 |
| N24 | 0 | 1 | 2 | |  | 0 | 3 | 3 |
| C1 | 0 | 1 | 1 | |  | -10 | -24 | -14 |
| C2 | 3 | 1 | -2 | |  | 0 | -5 | -5 |
| C3 | 3 | 2 | -2 | |  | 17 | 23 | 6 |
| C4 | 1 | 0 | -1 | |  | 15 | 22 | 7 |
| C5 | -4 | -2 | 3 | |  | 29 | 38 | 9 |
| C6 | -2 | -3 | 0 | |  | 10 | 24 | 14 |
| C7 | -3 | -1 | 2 | |  | 0 | 5 | 5 |
| C8 | 2 | 2 | 0 | |  | -17 | -23 | -6 |
| C9 | 3 | 1 | -1 | |  | -15 | -22 | -7 |
| C10 | 4 | 1 | -3 | |  | -29 | -38 | -9 |
| C11 | 0 | -1 | 0 | |  | -10 | -24 | -14 |
| C12 | -3 | -1 | 3 | |  | 0 | -5 | -5 |
| C13 | -3 | -2 | 2 | |  | 17 | 23 | 6 |
| C14 | 0 | 0 | 0 | |  | 15 | 22 | 7 |
| C15 | 4 | 2 | -3 | |  | 29 | 38 | 9 |
| C16 | 2 | 3 | 0 | |  | 10 | 24 | 14 |
| C17 | 3 | 1 | -2 | |  | 0 | 5 | 5 |
| C18 | -2 | -2 | 0 | |  | -17 | -23 | -6 |
| C19 | -3 | -1 | 1 | |  | -15 | -22 | -7 |
| C20 | -4 | -1 | 3 | |  | -29 | -38 | -9 |
|  |  | **|Mean|** | **1** | |  |  | **|Mean|** | **7** |
|  | **[Zn(5-NO2-OEP)]** | | | |  | **[Zn(TPP)]** | | |
|  | **MM Calc** | **Exp Obs** | **Obs-Calc** | |  | **MM Calc** | **Exp Obs** | **Obs-Calc** |
| Zn | 0 | -3 | -2 | |  | 0 | 0 | 0 |
| N21 | -1 | -3 | -2 | |  | 1 | 1 | 0 |
| N22 | 0 | 1 | 0 | |  | 1 | -1 | 0 |
| N23 | 1 | 1 | 0 | |  | -1 | -1 | 0 |
| N24 | -1 | -2 | -1 | |  | -1 | 1 | 0 |
| C1 | -2 | -3 | -2 | |  | 1 | 3 | -1 |
| C2 | 0 | 2 | 2 | |  | 3 | 3 | -1 |
| C3 | 3 | 8 | 5 | |  | 4 | 2 | -1 |
| C4 | 1 | 1 | 0 | |  | 3 | 1 | 0 |
| C5 | 3 | 3 | 1 | |  | 3 | 0 | 0 |
| C6 | 0 | 1 | 1 | |  | 3 | -1 | 0 |
| C7 | -2 | 1 | 4 | |  | 3 | -3 | 1 |
| C8 | -3 | -4 | -1 | |  | 2 | -3 | 1 |
| C9 | 0 | -2 | -2 | |  | 1 | -3 | 1 |
| C10 | 2 | -6 | -8 | |  | 0 | -3 | 1 |
| C11 | 1 | 0 | -1 | |  | -1 | -3 | 1 |
| C12 | 0 | 0 | 0 | |  | -3 | -3 | 1 |
| C13 | -2 | 4 | 5 | |  | -4 | -2 | 1 |
| C14 | 0 | 3 | 3 | |  | -3 | -1 | 0 |
| C15 | 2 | 7 | 6 | |  | -3 | 0 | 0 |
| C16 | 1 | -1 | -2 | |  | -3 | 1 | 0 |
| C17 | 3 | 1 | -1 | |  | -3 | 3 | -1 |
| C18 | -2 | 0 | 2 | |  | -2 | 3 | -1 |
| C19 | -2 | -5 | -2 | |  | -1 | 3 | -1 |
| C20 | -2 | -6 | -4 | |  | 0 | 3 | -1 |
|  |  | **|Mean|** | **2** | |  |  | **|Mean|** | **1** |
|  | **[Zn(TTP)]** | | | |  | **[Zn(2,3,12,13-tetrabromo-TPP)]** | | |
|  | **MM Calc** | **Exp Obs** | **Obs-Calc** | |  | **MM Calc** | **Exp Obs** | **Obs-Calc** |
| Zn | 0 | 0 | 0 | |  | 0 | 0 | 0 |
| N21 | -1 | -3 | -1 | |  | 7 | 5 | -2 |
| N22 | -1 | 4 | 4 | |  | 5 | 4 | -1 |
| N23 | 2 | 3 | 1 | |  | -6 | -5 | 1 |
| N24 | 1 | -4 | -4 | |  | -6 | -4 | 2 |
| C1 | -1 | 2 | 3 | |  | -8 | -5 | 3 |
| C2 | 2 | 4 | 2 | |  | -14 | -9 | 5 |
| C3 | 6 | 1 | -5 | |  | 3 | 2 | -1 |
| C4 | 1 | -3 | -3 | |  | 12 | 8 | -5 |
| C5 | -4 | -4 | 0 | |  | 17 | 11 | -7 |
| C6 | -3 | 0 | 3 | |  | 6 | 4 | -2 |
| C7 | -3 | -1 | 1 | |  | -10 | -6 | 4 |
| C8 | 1 | 1 | 0 | |  | -18 | -12 | 7 |
| C9 | 2 | 2 | 1 | |  | 0 | 0 | 0 |
| C10 | 4 | 0 | -5 | |  | 12 | 7 | -4 |
| C11 | 1 | -2 | -3 | |  | 8 | 5 | -3 |
| C12 | -2 | -4 | -2 | |  | 14 | 9 | -5 |
| C13 | -6 | -1 | 5 | |  | -3 | -2 | 1 |
| C14 | -1 | 3 | 3 | |  | -12 | -8 | 5 |
| C15 | 4 | 4 | 0 | |  | -18 | -11 | 7 |
| C16 | 3 | 0 | -3 | |  | -6 | -4 | 2 |
| C17 | 2 | 1 | -1 | |  | 10 | 6 | -4 |
| C18 | -1 | -1 | 0 | |  | 18 | 12 | -7 |
| C19 | -2 | -2 | 0 | |  | 0 | 0 | 0 |
| C20 | -4 | 0 | 5 | |  | -12 | -7 | 4 |
|  |  | **|Mean|** | **2** | |  |  | **|Mean|** | **3** |
|  | **[Zn(TPOMeP)]** | | | |  | **[Zn(TPF5P)]** | | |
|  | **MM Calc** | **Exp Obs** | **Obs-Calc** | |  | **MM Calc** | **Exp Obs** | **Obs-Calc** |
| Zn | 0 | 0 | 0 | |  | 0 | 0 | 0 |
| N21 | 2 | 5 | 3 | |  | 2 | 5 | 3 |
| N22 | -2 | -10 | -8 | |  | -2 | -10 | -8 |
| N23 | -2 | -5 | -3 | |  | -2 | -5 | -3 |
| N24 | 3 | 10 | 7 | |  | 3 | 10 | 7 |
| C1 | 4 | 3 | -1 | |  | 4 | 3 | -1 |
| C2 | 0 | -3 | -3 | |  | 0 | -3 | -3 |
| C3 | -7 | -6 | 1 | |  | -7 | -6 | 1 |
| C4 | -3 | 0 | 3 | |  | -3 | 0 | 3 |
| C5 | -2 | 0 | 2 | |  | -2 | 0 | 2 |
| C6 | 1 | -2 | -3 | |  | 1 | -2 | -3 |
| C7 | 8 | 9 | 1 | |  | 8 | 9 | 1 |
| C8 | 4 | 5 | 1 | |  | 4 | 5 | 1 |
| C9 | -3 | -5 | -2 | |  | -3 | -5 | -2 |
| C10 | -9 | -6 | 3 | |  | -9 | -6 | 3 |
| C11 | -4 | -3 | 1 | |  | -4 | -3 | 1 |
| C12 | 0 | 3 | 3 | |  | 0 | 3 | 3 |
| C13 | 7 | 6 | -1 | |  | 7 | 6 | -1 |
| C14 | 3 | 0 | -3 | |  | 3 | 0 | -3 |
| C15 | 2 | 0 | -2 | |  | 2 | 0 | -2 |
| C16 | -1 | 2 | 3 | |  | -1 | 2 | 3 |
| C17 | -8 | -9 | -1 | |  | -8 | -9 | -1 |
| C18 | -4 | -5 | -1 | |  | -4 | -5 | -1 |
| C19 | 3 | 5 | 2 | |  | 3 | 5 | 2 |
| C20 | 9 | 6 | -3 | |  | 9 | 6 | -3 |
|  |  | **|Mean|** | **2** | |  |  | **|Mean|** | **2** |
|  | **[Zn(5,10,15,20-tetrakis(4-(*n*-octyl)phenylporphyrin]** | | | |  | **[Zn(TPClP)]** | | |
|  | **MM Calc** | **Exp Obs** | **Obs-Calc** | |  | **MM Calc** | **Exp Obs** | **Obs-Calc** |
| Zn | 2 | 14 | 12 | |  | -2 | -17 | -15 |
| N21 | 7 | 13 | 6 | |  | 28 | 18 | -10 |
| N22 | 6 | 1 | -5 | |  | -26 | -17 | 10 |
| N23 | 0 | 6 | 6 | |  | -16 | -45 | -30 |
| N24 | 1 | 0 | -1 | |  | 18 | 22 | 3 |
| C1 | 23 | 18 | -5 | |  | 41 | 33 | -8 |
| C2 | 47 | 30 | -17 | |  | 9 | 27 | 18 |
| C3 | 42 | 25 | -17 | |  | 2 | 19 | 18 |
| C4 | 18 | 13 | -4 | |  | 24 | 17 | -7 |
| C5 | 3 | 2 | -1 | |  | 32 | 24 | -7 |
| C6 | -7 | -7 | 0 | |  | 12 | 12 | -1 |
| C7 | -37 | -22 | 15 | |  | 37 | 18 | -19 |
| C8 | -38 | -24 | 14 | |  | 4 | -12 | -16 |
| C9 | -7 | -8 | -1 | |  | -42 | -34 | 7 |
| C10 | 8 | 0 | -8 | |  | -88 | -66 | 22 |
| C11 | 17 | 14 | -3 | |  | -92 | -71 | 21 |
| C12 | 46 | 28 | -18 | |  | -141 | -97 | 44 |
| C13 | 39 | 22 | -16 | |  | -121 | -84 | 37 |
| C14 | 6 | 7 | 1 | |  | -62 | -49 | 12 |
| C15 | -19 | -14 | 5 | |  | -24 | -15 | 9 |
| C16 | -28 | -21 | 7 | |  | 29 | 26 | -3 |
| C17 | -72 | -50 | 22 | |  | 111 | 74 | -36 |
| C18 | -61 | -44 | 17 | |  | 142 | 97 | -45 |
| C19 | -12 | -11 | 1 | |  | 77 | 62 | -15 |
| C20 | 14 | 7 | -8 | |  | 77 | 62 | -15 |
|  |  | **|Mean|** | **9** | |  |  | **|Mean|** | **17** |
|  |  |  |  | |  |  |  |  |
|  | **[Zn(OClTPF5P)]** | | | |  |  | | |
|  | **MM Calc** | **Exp Obs** | **Obs-Calc** | |  | **MM Calc** | **Exp Obs** | **Obs-Calc** |
| Zn | 0 | 0 | 0 | |  |  |  |  |
| N21 | -1 | 9 | 10 | |  |  |  |  |
| N22 | 3 | -5 | -9 | |  |  |  |  |
| N23 | 1 | 12 | 11 | |  |  |  |  |
| N24 | -4 | -15 | -11 | |  |  |  |  |
| C1 | 24 | 32 | 9 | |  |  |  |  |
| C2 | 73 | 74 | 1 | |  |  |  |  |
| C3 | 67 | 67 | 0 | |  |  |  |  |
| C4 | 17 | 20 | 3 | |  |  |  |  |
| C5 | -9 | -9 | 0 | |  |  |  |  |
| C6 | -22 | -31 | -8 | |  |  |  |  |
| C7 | -68 | -69 | -1 | |  |  |  |  |
| C8 | -59 | -58 | 1 | |  |  |  |  |
| C9 | -9 | -12 | -2 | |  |  |  |  |
| C10 | 20 | 21 | 1 | |  |  |  |  |
| C11 | 32 | 42 | 10 | |  |  |  |  |
| C12 | 80 | 83 | 3 | |  |  |  |  |
| C13 | 69 | 69 | 0 | |  |  |  |  |
| C14 | 16 | 19 | 3 | |  |  |  |  |
| C15 | -17 | -17 | -1 | |  |  |  |  |
| C16 | -33 | -43 | -10 | |  |  |  |  |
| C17 | -85 | -88 | -3 | |  |  |  |  |
| C18 | -78 | -79 | -1 | |  |  |  |  |
| C19 | -23 | -27 | -4 | |  |  |  |  |
| C20 | 6 | 6 | -1 | |  |  |  |  |
|  |  | **|Mean|** | **4** | |  |  |  |  |

**Fig. S1** Error response surface for the modelling of four-coordinate Cu(II) porphyrins as a function of the strain-free bond length, *l*o (Å), and the bond stretching force constant, *k*s. The global minimum falls in a valley that is shallow in the *k*s direction. This means that, whereas the value of *l*o is quite tightly defined, a fairly wide range in *k*s values still produces an error response close to the minimum value.

**Fig. S2** Error response surface for the modelling of four-coordinate Ni(II) porphyrins as a function of the strain-free bond length, *l*o (Å), and the bond stretching force constant, *k*s (mdyn Å-1). The error response surface seen was obtained from the trained ANN architecture (containing four neurons in the hidden layer) that predicted the global minimum to have an error of 0.0185 Å at *k*s and *l*o values of 3.0 mdyn Å-1 and 1.868 Å, respectively. The global minimum is marked by a filled circle.


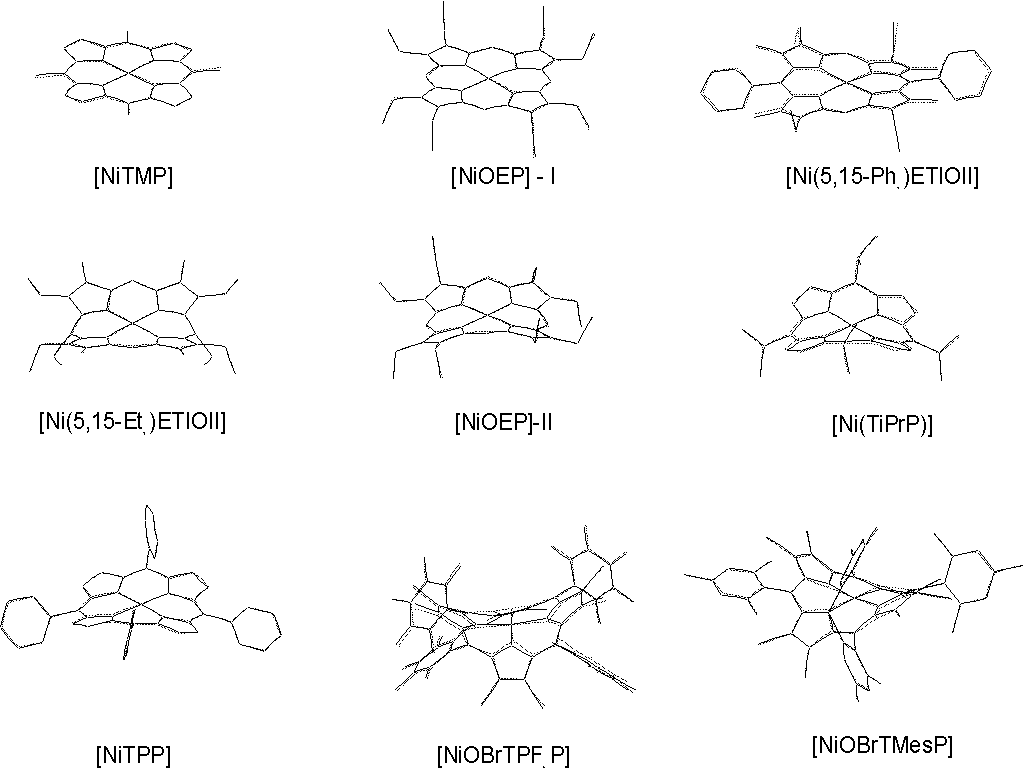


**Fig. S3** A comparison of the crystal structures of nine Ni(II) 4-coordinate porphyrins (solid line) and the structures generated by molecular mechanics methods using the *k*s and *l*o values found by ANNs (dotted line).


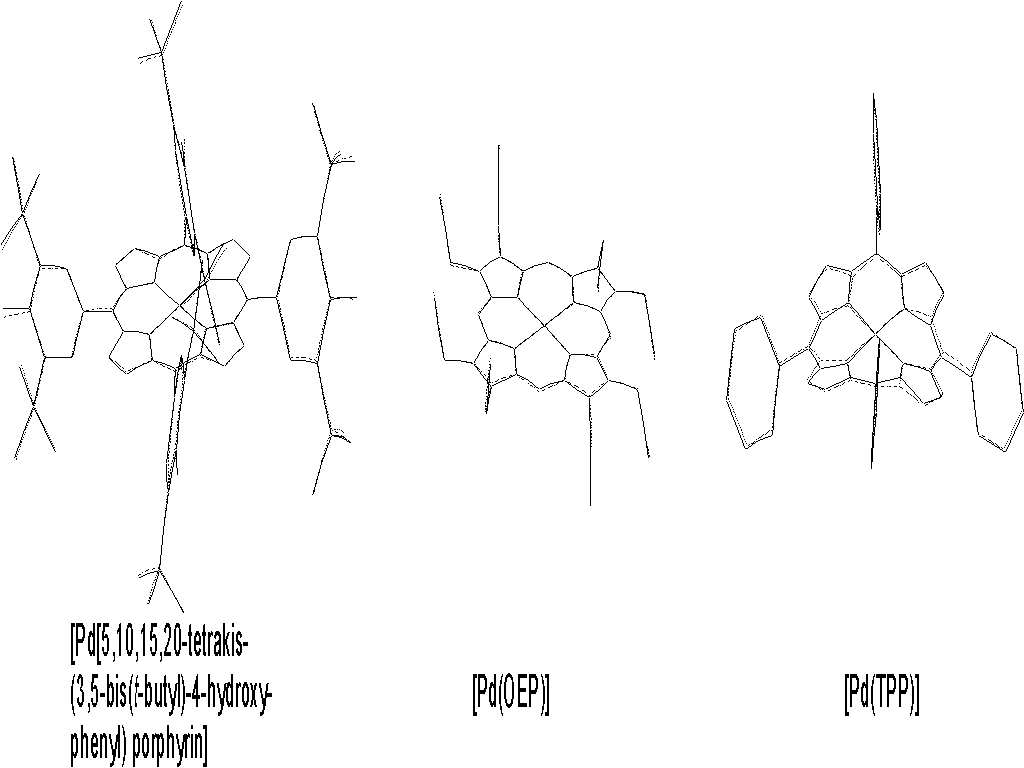
**Fig. S4** The error response surface for the modelling of Pd(II) porphyrins generated by the trained ANN architecture with 7 neurons in the hidden layer. The global minimum is marked by a filled circle.

**Fig. S5** A comparison of the crystal structures of three Pd(II) 4-coordinate porphyrins (solid line) and the structures generated by molecular mechanics methods using the *k*s and *l*o values found by ANNs (dotted line).

**Fig. S6**  The error response surface for the modelling of Zn(II) porphyrins generated by the trained ANN architecture with 9 neurons in the hidden layer. The global minimum is marked by the filled circle.

**
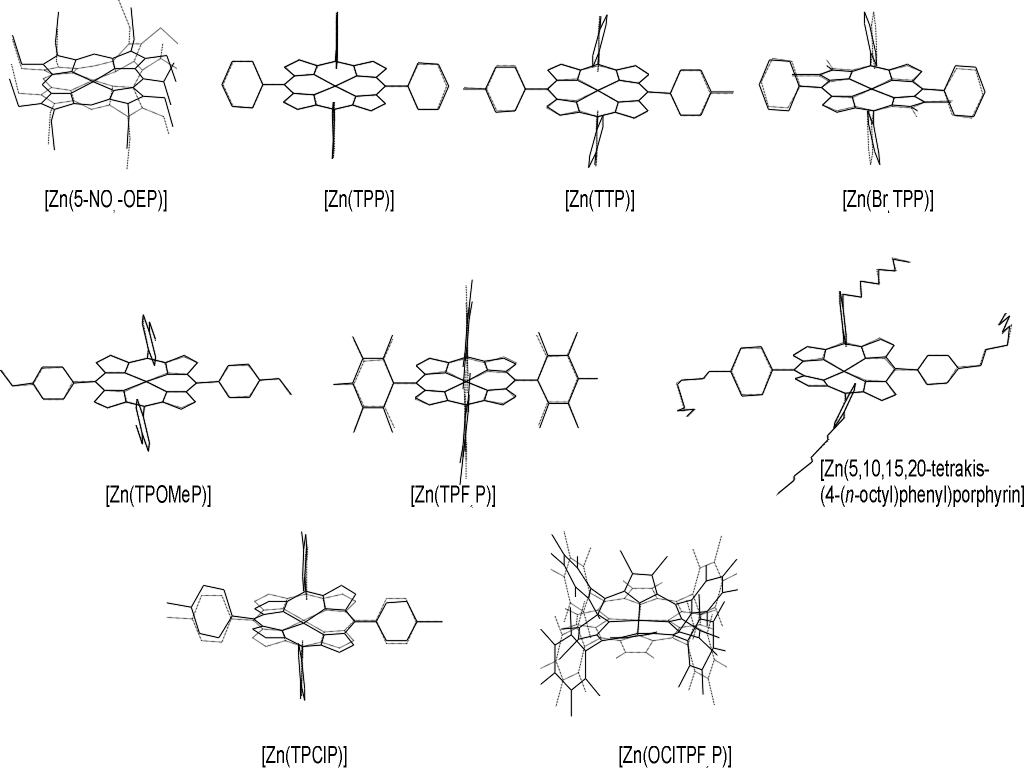
**

**Fig. S7**  A comparison of the crystal structures of nine Zn(II) 4-coordinate porphyrins (solid line) and the structures generated by molecular mechanics methods using the *k*s and *l*o values found by ANNs (dotted line).


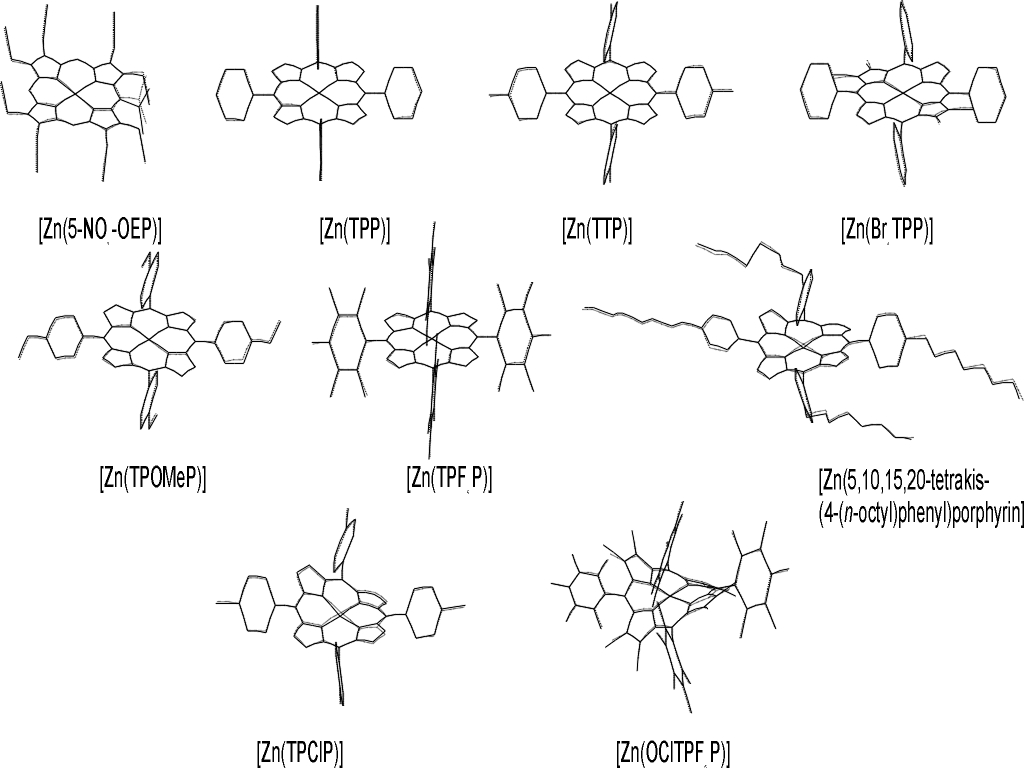


**Fig. S7**  A comparison of the crystal structures of nine Zn(II) 4-coordinate porphyrins (solid line) and the structures generated by molecular mechanics methods (dotted line), using the best possible values of *k*s and *l*o commensurate with the retaining of the modelled structures in the conformations observed crystallographically.
